# Supplementary material
Source: Elsevier journal article supplement (https://www.sciencedirect.com/science/article/pii/S087025512030442X)
Supplement: mmc1 [file S087025512030442X:mmc1.docx]

Supplementary Material

Table S1. Main characteristics of studies cited in the manuscript

| Study | Population | Intervention | Primary Outcome |
| --- | --- | --- | --- |
| - NOAC vs. warfarin in non-valvular AF | | | |
| RE-LY8 | 18 113 patients with AF | Dabigatran 110 or 150 mg twice daily vs. warfarin | Stroke or SE: 1.54, 1.11 and 1.71%/year; D110 vs. W RR 0.90 (95% CI 0.74-1.10); D150 vs. W RR 0.65 (95% CI 0.52-0.81)  Major Bleeding: 2.87, 3.32 and 3.57%/year; D110 vs. W RR 0.80 (95% CI 0.70-0.93); D150 vs. W RR 0.93 (95% CI 0.81-1.07) |
| ROCKET-AF18 | 14,264 patients with AF | Rivaroxaban 20 (15) mg vs. warfarin | Stroke or SE: 2.1 vs. 2.4%/year (HR 0.88; 95% CI 0.74-1.03)  Major and nonmajor clinically relevant bleeding: 14.9 vs. 14.5%/year (HR 1.03; 95% CI 0.96-1.11) |
| ARISTOTLE19 | 18,201 patients with AF | Apixaban 5 (2.5) mg twice daily vs. warfarin | Stroke or SE: 1.27 vs. 1.60%/year (HR 0.79; 95% CI 0.66-0.95)  Major bleeding: 2.13 vs. 3.09%/year (HR 0.69; 95% CI 0.60-0.80) |
| ENGAGE AF-TIMI 4820 | 21,105 patients with AF | Edoxaban 60 (30) or 30 (15) mg vs. warfarin | Stroke or SE: 1.57, 2.04 and 1.80%/year; E60(30) vs. W HR 0.87 (95% CI 0.73-1.04); E30(15) vs. W HR 1.13 (95% CI 0.96-1.34)  Major Bleeding: 2.15, 1.61 and 3.43%/year; E60(30) vs. W HR 0.80 (95% CI 0.71-0.91); E30(15) vs. W HR 0.47 (95% CI 0.41-0.55) |
| - Prolonged heart rhythm monitoring after a cryptogenic stroke | | | |
| EMBRACE28 | 572 patients with cryptogenic ischemic stroke or TIA <6 months | Ambulatory ECG monitoring with a 30-day event-triggered loop recorder (intervention group) vs. 24-hour Holter monitoring (control group) | AF: 9.9% vs. 2.5% (absolute difference 7.4%; 95% CI 3.4 to 11.3) |
| CRYSTAL29 | 441 patients with cryptogenic ischemic stroke or TIA | Long-term monitoring with an insertable cardiac monitor (ICM) vs. conventional follow-up (control) | AF by 6 months: 8.9% vs. 1.4% (HR 6.4; 95% CI 1.9-21.7) |
| - Screening of AF | | | |
| Apple Heart Study35 | 419,297 participants without known AF | Apple Watch PPG vs. ECG patch | Of the 2089 irregular tachograms identified by Aplle Watch, 1489 showed simultaneous AF on ECG patch - positive predictive value 0.71 (97.5% CI, 0.69 to 0.74) |
| Huawei Heart Study36 | 187,912 participants | Huawei PPG technology vs. | Of 262 individuals with PPG signals of suspected AF, 227 (87%) were confirmed as having AF, with the positive predictive value of PPG signals being 91.6% (95% CI 91.5%-91.8%) |
| - AF catheter ablation | | | |
| CABANA40 | 2,204 patients with symptomatic AF | AF catheter ablation vs. conventional medical therapy | Death, disabling stroke, serious bleeding, or cardiac arrest: 8% vs. 9.2% (HR 0.86; 95% CI 0.65-1.15) |
| CASTLE-AF41 | 363 patients with HF, LVEF35% and AF | AF catheter ablation vs. conventional medical therapy | Death or hospitalization for worsening HF: 28.5% vs. 44.6% (HR 0.62; 95% CI 0.43-0.87) |
| COMPARE44 | 1,584 patients undergoing AF catheter ablation | Continuous warfarin vs. warfarin discontinuation | Thromboembolic events: 0.25% vs. 4.9% (RR 0.051, 95% CI 0.012-0.211) |
| - NOAC reversal agent | | | |
| REVERSE-AD81 | 301 patients with uncontrolled bleeding and 202 undergoing an urgent procedure | Idarucizumab open label | 100% of maximum percentage reversal of dabigatran within 4 hours |
| ANNEXA-482 | 352 patients with major bleeding under a factor Xa inhibitor | andexanet alfa open label | 92% change in anti-factor Xa activity after andexanet alfa; 82% of patients with excellent or good hemostasis 12 hours after andexanet alfa |
| - Closure of left atrial appendage | | | |
| PROTECT-AF87 | 707 patients with AF | Watchman LAA closure device vs. warfarin | Stroke or SE or CV/unexplained death: 3.0%/year vs. 4.3%/year |
| PREVAIL88 | 407 patients with AF | Watchman LAA closure device vs. warfarin | Stroke or SE or CV/unexplained death at 18 months: 6.4% vs. 6.3% |

AF: Atrial fibrillation; CV: Cardiovascular; ECG: Electrocardiogram; HF: Heart failure; LAA: Left atrial appendage; LVEF: Left ventricular ejection fraction; NOAC: Non-vitamin K antagonist oral anticoagulant; PPG: Photoplethysmography; RR: SE: Systemic embolism; W: Warfarin.
